# Supplementary material for: The MYCL and MXD1 transcription factors regulate the fitness of murine dendritic cells
Source: PubMed Central journal article supplement — Proc Natl Acad Sci U S A. 2020 Feb 18;117(9):4885–93. doi: 10.1073/pnas.1915060117 (PMC7060746; doi:10.1073/pnas.1915060117), 2020-02-18
Supplement: pnas.1915060117.sapp.pdf [file pnas.1915060117.sapp.pdf]

Supplementary Information for

**The MYCL and MXD1 transcription factors regulate the fitness of murine dendritic cells**

David A. Anderson III, Theresa L. Murphy, Robert N. Eisenman, Kenneth M. Murphy  
Email: kmurphy@wustl.edu

**This PDF file includes:**

Tables S1 to S6

| Gene Set                                                                                 | SIZE | NES   | p-val | q-val |
|------------------------------------------------------------------------------------------|------|-------|-------|-------|
| GO_RIBOSOME_BIOGENESIS                                                                   | 247  | 2.03  | 0.00  | 0.03  |
| GO_RRNA_METABOLIC_PROCESS                                                                | 203  | 2.02  | 0.00  | 0.02  |
| GO_NUCLEAR_TRANSCRIBED_MRNA_CATABOLIC_PROCESS_NONSENSE_MEDIATED_DECAY                    | 98   | 2.02  | 0.00  | 0.01  |
| GO_TRANSLATIONAL_INITIATION                                                              | 122  | 1.99  | 0.00  | 0.02  |
| GO_FORMATION_OF_TRANSLATION_PREINITIATION_COMPLEX                                        | 17   | 1.95  | 0.00  | 0.03  |
| GO_RIBONUCLEOPROTEIN_COMPLEX_BIOGENESIS                                                  | 351  | 1.94  | 0.00  | 0.02  |
| GO_POSITIVE_REGULATION_OF_TELOMERE_MAINTENANCE                                           | 40   | 1.91  | 0.00  | 0.03  |
| GO_RIBOSOMAL_SMALL_SUBUNIT_BIOGENESIS                                                    | 41   | 1.90  | 0.00  | 0.03  |
| GO_RIBOSOMAL_LARGE_SUBUNIT_BIOGENESIS                                                    | 38   | 1.89  | 0.00  | 0.03  |
| GO_POSITIVE_REGULATION_OF_TELOMERE_MAINTENANCE_VIA_TELOMERE_LENGTHENING                  | 30   | 1.88  | 0.00  | 0.04  |
| GO_NCRNA_PROCESSING                                                                      | 312  | 1.86  | 0.00  | 0.04  |
| GO_MATURATION_OF_SSU_RRNA                                                                | 31   | 1.86  | 0.00  | 0.04  |
| GO_RNA_CATABOLIC_PROCESS                                                                 | 195  | 1.85  | 0.00  | 0.04  |
| GO_REGULATION_OF_TELOMERE_MAINTENANCE_VIA_TELOMERE_LENGTHENING                           | 44   | 1.85  | 0.00  | 0.04  |
| GO_MATURATION_OF_5_8S_RRNA                                                               | 25   | 1.85  | 0.00  | 0.04  |
| GO_ESTABLISHMENT_OF_PROTEIN_LOCALIZATION_TO_ENDOPLASMIC_RETICULUM                        | 85   | 1.84  | 0.00  | 0.04  |
| GO_PROTEIN_MODIFICATION_BY_SMALL_PROTEIN_REMOVAL                                         | 98   | 1.83  | 0.00  | 0.05  |
| GO_NCRNA_METABOLIC_PROCESS                                                               | 441  | 1.80  | 0.00  | 0.06  |
| GO_REGULATION_OF_LIPOPROTEIN_LIPASE_ACTIVITY                                             | 15   | 1.79  | 0.00  | 0.07  |
| GO_POSITIVE_REGULATION_OF_GLIAL_CELL_DIFFERENTIATION                                     | 29   | 1.79  | 0.00  | 0.07  |
| GO_REGULATION_OF_OXIDATIVE_STRESS_INDUCED_INTRINSIC_APOPTOTIC_SIGNALING_PATHWAY          | 24   | 1.78  | 0.00  | 0.07  |
| GO_NCRNA_CATABOLIC_PROCESS                                                               | 18   | 1.77  | 0.00  | 0.08  |
| GO_S_ADENOSYLMETHIONINE_METABOLIC_PROCESS                                                | 18   | 1.76  | 0.00  | 0.08  |
| GO_CYTOPLASMIC_TRANSLATION                                                               | 34   | 1.76  | 0.00  | 0.08  |
| GO_MULTI_ORGANISM_METABOLIC_PROCESS                                                      | 113  | 1.75  | 0.00  | 0.09  |
| GO_PROTEIN_TRANSMEMBRANE_TRANSPORT                                                       | 44   | 1.75  | 0.00  | 0.09  |
| GO_OXIDATIVE_PHOSPHORYLATION                                                             | 71   | 1.74  | 0.00  | 0.09  |
| GO_REGULATION_OF_TRANSLATIONAL_ELONGATION                                                | 19   | 1.74  | 0.00  | 0.09  |
| GO_EPITHELIAL_STRUCTURE_MAINTENANCE                                                      | 18   | 1.73  | 0.01  | 0.10  |
| GO_NEGATIVE_REGULATION_OF_OXIDATIVE_STRESS_INDUCED_INTRINSIC_APOPTOTIC_SIGNALING_PATHWAY | 16   | 1.73  | 0.00  | 0.09  |
| GO_PROTEIN_LOCALIZATION_TO_MITOCHONDRION                                                 | 58   | 1.73  | 0.00  | 0.09  |
| GO_MITOCHONDRIAL_TRANSMEMBRANE_TRANSPORT                                                 | 47   | 1.72  | 0.00  | 0.10  |
| GO_CELLULAR_RESPIRATION                                                                  | 123  | 1.72  | 0.00  | 0.11  |
| GO_RIBONUCLEOPROTEIN_COMPLEX_SUBUNIT_ORGANIZATION                                        | 162  | 1.71  | 0.00  | 0.11  |
| GO_REGULATION_OF_MRNA_METABOLIC_PROCESS                                                  | 98   | 1.71  | 0.00  | 0.11  |
| GO_RNA_SECONDARY_STRUCTURE_UNWINDING                                                     | 38   | 1.71  | 0.00  | 0.11  |
| GO_AMIDE_BIOSYNTHETIC_PROCESS                                                            | 425  | 1.70  | 0.00  | 0.11  |
| GO_TRNA_MODIFICATION                                                                     | 49   | 1.70  | 0.00  | 0.11  |
| GO_RIBOSOME_ASSEMBLY                                                                     | 46   | 1.70  | 0.00  | 0.11  |
| GO_MATURATION_OF_SSU_RRNA_FROM_TRICISTRONIC_RRNA_TRANSCRIPT_SSU_RRNA_5_8S_RRNA_LSU_RRNA_ | 24   | 1.69  | 0.00  | 0.12  |
| GO_RNA_SPLICING_VIA_TRANSESTERIFICATION_REACTIONS                                        | 216  | 1.69  | 0.00  | 0.11  |
| GO_NEGATIVE_REGULATION_OF_MRNA_METABOLIC_PROCESS                                         | 28   | 1.69  | 0.00  | 0.12  |
| GO_RNA_MODIFICATION                                                                      | 93   | 1.69  | 0.00  | 0.12  |
| GO_HISTONE_MONOUBIQUITINATION                                                            | 18   | 1.69  | 0.01  | 0.12  |
| GO_CALCIIUM_DEPENDENT_CELL_CELL_ADHESION_VIA_PLASMA_MEMBRANE_CELL_ADHESION_MOLECULES     | 17   | -1.71 | 0.00  | 0.13  |
| GO_CELLULAR_DEFENSE_RESPONSE                                                             | 36   | -1.79 | 0.00  | 0.09  |
| GO_REGULATION_OF_B_CELL_MEDIATED_IMMUNITY                                                | 31   | -1.82 | 0.00  | 0.07  |
| GO_POSITIVE_REGULATION_OF_ACUTE_INFLAMMATORY_RESPONSE                                    | 25   | -2.14 | 0.00  | 0.01  |
| GO_MEMBRANE_RAFT_ORGANIZATION                                                            | 16   | -2.21 | 0.00  | 0.01  |
| GO_POSITIVE_REGULATION_OF_B_CELL_MEDIATED_IMMUNITY                                       | 21   | -2.42 | 0.00  | 0.00  |

Table S1. GO-based GSEA results for expression microarray experiment on splenic cDC1s isolated at steady state from *Mycl*<sup>+/+</sup> and *Mycl*<sup>gfp/gfp</sup> mice. The top 50 gene sets are reported and their ranked normalized enrichment scores.

| Gene Set                                                                                  | SIZE | NES   | p-val | q-val |
|-------------------------------------------------------------------------------------------|------|-------|-------|-------|
| GO_RRNA_METABOLIC_PROCESS                                                                 | 203  | 2.62  | 0.00  | 0.00  |
| GO_RIBOSOME_BIOGENESIS                                                                    | 247  | 2.56  | 0.00  | 0.00  |
| GO_TRANSLATIONAL_INITIATION                                                               | 122  | 2.47  | 0.00  | 0.00  |
| GO_RIBONUCLEOPROTEIN_COMPLEX_BIOGENESIS                                                   | 351  | 2.45  | 0.00  | 0.00  |
| GO_NCRNA_PROCESSING                                                                       | 312  | 2.40  | 0.00  | 0.00  |
| GO_MULTI_ORGANISM_METABOLIC_PROCESS                                                       | 113  | 2.40  | 0.00  | 0.00  |
| GO_NCRNA_METABOLIC_PROCESS                                                                | 441  | 2.35  | 0.00  | 0.00  |
| GO_NUCLEAR_TRANSCRIBED_MRNA_CATABOLIC_PROCESS_NONSENSE_MEDIATED_DECAY                     | 98   | 2.34  | 0.00  | 0.00  |
| GO_RIBOSOMAL_SMALL_SUBUNIT_BIOGENESIS                                                     | 41   | 2.32  | 0.00  | 0.00  |
| GO_ESTABLISHMENT_OF_PROTEIN_LOCALIZATION_TO_ENDOPLASMIC_RETICULUM                         | 85   | 2.28  | 0.00  | 0.00  |
| GO_RIBOSOMAL_LARGE_SUBUNIT_BIOGENESIS                                                     | 38   | 2.23  | 0.00  | 0.00  |
| GO_RIBONUCLEOPROTEIN_COMPLEX_LOCALIZATION                                                 | 89   | 2.21  | 0.00  | 0.00  |
| GO_RNA_CATABOLIC_PROCESS                                                                  | 195  | 2.21  | 0.00  | 0.00  |
| GO_TRANSLATIONAL_TERMINATION                                                              | 84   | 2.20  | 0.00  | 0.00  |
| GO_MITOCHONDRIAL_TRANSLATION                                                              | 96   | 2.19  | 0.00  | 0.00  |
| GO_AMIDE_BIOSYNTHETIC_PROCESS                                                             | 426  | 2.19  | 0.00  | 0.00  |
| GO_MRNA_METABOLIC_PROCESS                                                                 | 490  | 2.19  | 0.00  | 0.00  |
| GO_MATURATION_OF_SSU_RRNA                                                                 | 31   | 2.18  | 0.00  | 0.00  |
| GO_TRNA_METABOLIC_PROCESS                                                                 | 151  | 2.18  | 0.00  | 0.00  |
| GO_AMINO_ACID_ACTIVATION                                                                  | 46   | 2.17  | 0.00  | 0.00  |
| GO_MATURATION_OF_5_8S_RRNA                                                                | 25   | 2.17  | 0.00  | 0.00  |
| GO_RIBONUCLEOPROTEIN_COMPLEX_SUBUNIT_ORGANIZATION                                         | 162  | 2.16  | 0.00  | 0.00  |
| GO_CLEAVAGE_INVOLVED_IN_RRNA_PROCESSING                                                   | 16   | 2.16  | 0.00  | 0.00  |
| GO_CELLULAR_PROTEIN_COMPLEX_DISASSEMBLY                                                   | 110  | 2.15  | 0.00  | 0.00  |
| GO_RNA_3_END_PROCESSING                                                                   | 76   | 2.15  | 0.00  | 0.00  |
| GO_RNA_SPLICING_VIA_TRANSESTERIFICATION_REACTIONS                                         | 216  | 2.15  | 0.00  | 0.00  |
| GO_OXIDATIVE_PHOSPHORYLATION                                                              | 71   | 2.14  | 0.00  | 0.00  |
| GO_NUCLEAR_EXPORT                                                                         | 114  | 2.14  | 0.00  | 0.00  |
| GO_TRANSLATIONAL_ELONGATION                                                               | 99   | 2.14  | 0.00  | 0.00  |
| GO_REGULATION_OF_TRANSLATIONAL_ELONGATION                                                 | 19   | 2.13  | 0.00  | 0.00  |
| GO_MATURATION_OF_5_8S_RRNA_FROM_TRICISTRONIC_RRNA_TRANSCRIPT_SSU_RRNA_5_8S_RRNA_LSU_RRNA_ | 17   | 2.13  | 0.00  | 0.00  |
| GO_DNA_TEMPLATED_TRANSCRIPTION_TERMINATION                                                | 80   | 2.13  | 0.00  | 0.00  |
| GO_MRNA_3_END_PROCESSING                                                                  | 56   | 2.12  | 0.00  | 0.00  |
| GO_RNA_LOCALIZATION                                                                       | 141  | 2.11  | 0.00  | 0.00  |
| GO_MATURATION_OF_SSU_RRNA_FROM_TRICISTRONIC_RRNA_TRANSCRIPT_SSU_RRNA_5_8S_RRNA_LSU_RRNA_  | 24   | 2.10  | 0.00  | 0.00  |
| GO_PROTEIN_LOCALIZATION_TO_ENDOPLASMIC_RETICULUM                                          | 103  | 2.08  | 0.00  | 0.00  |
| GO_DNA_REPLICATION_INITIATION                                                             | 21   | 2.08  | 0.00  | 0.00  |
| GO_RNA_SPLICING                                                                           | 284  | 2.08  | 0.00  | 0.00  |
| GO_RIBOSOME_ASSEMBLY                                                                      | 46   | 2.08  | 0.00  | 0.00  |
| GO_MRNA_PROCESSING                                                                        | 339  | 2.07  | 0.00  | 0.00  |
| GO_RRNA_MODIFICATION                                                                      | 18   | 2.07  | 0.00  | 0.00  |
| GO_SPLICEOSOMAL_SNRNP_ASSEMBLY                                                            | 30   | 2.06  | 0.00  | 0.00  |
| GO_TERMINATION_OF_RNA_POLYMERASE_II_TRANSCRIPTION                                         | 46   | 2.06  | 0.00  | 0.00  |
| GO_NEURON_FATE_SPECIFICATION                                                              | 29   | -2.09 | 0.00  | 0.01  |
| GO_REGULATION_OF_SYNCYTIUM_FORMATION_BY_PLASMA_MEMBRANE_FUSION                            | 22   | -2.21 | 0.00  | 0.00  |
| GO_ORGAN_MATURATION                                                                       | 16   | -2.25 | 0.00  | 0.00  |
| GO_REGULATION_OF_MYOBLAST_FUSION                                                          | 17   | -2.34 | 0.00  | 0.00  |
| GO_CHEMOKINE_MEDIATED_SIGNALING_PATHWAY                                                   | 49   | -2.48 | 0.00  | 0.00  |
| GO_PHOSPHOLIPASE_C_ACTIVATING_G_PROTEIN_COUPLED_RECEPTOR_SIGNALING_PATHWAY                | 67   | -2.48 | 0.00  | 0.00  |
| GO_CALCIUM_INDEPENDENT_CELL_CELL_ADHESION_VIA_PLASMA_MEMBRANE_CELL_ADHESION_MOLECULES     | 19   | -2.68 | 0.00  | 0.00  |

Table S2. GO-based GSEA results for expression microarray experiment on splenic cDC1s isolated at steady state from *MycI<sup>gfp/+</sup>* and *MycI<sup>gfp/gfp</sup>* mice. The top 50 gene sets are reported and their ranked normalized enrichment scores.

| Gene Set                                                                                 | SIZE | NES  | p-val | q-val |
|------------------------------------------------------------------------------------------|------|------|-------|-------|
| GO_RIBOSOME_BIOGENESIS                                                                   | 247  | 3.66 | 0.00  | 0.00  |
| GO_RRNA_METABOLIC_PROCESS                                                                | 203  | 3.66 | 0.00  | 0.00  |
| GO_TRANSLATIONAL_INITIATION                                                              | 122  | 3.64 | 0.00  | 0.00  |
| GO_ESTABLISHMENT_OF_PROTEIN_LOCALIZATION_TO_ENDOPLASMIC_RETICULUM                        | 85   | 3.64 | 0.00  | 0.00  |
| GO_MULTI_ORGANISM_METABOLIC_PROCESS                                                      | 113  | 3.58 | 0.00  | 0.00  |
| GO_NUCLEAR_TRANSCRIBED_MRNA_CATABOLIC_PROCESS_NONSENSE_MEDIATED_DECAY                    | 98   | 3.57 | 0.00  | 0.00  |
| GO_RIBONUCLEOPROTEIN_COMPLEX_BIOGENESIS                                                  | 351  | 3.53 | 0.00  | 0.00  |
| GO_PROTEIN_LOCALIZATION_TO_ENDOPLASMIC_RETICULUM                                         | 103  | 3.48 | 0.00  | 0.00  |
| GO_NCRNA_PROCESSING                                                                      | 312  | 3.41 | 0.00  | 0.00  |
| GO_NCRNA_METABOLIC_PROCESS                                                               | 441  | 3.31 | 0.00  | 0.00  |
| GO_RNA_CATABOLIC_PROCESS                                                                 | 195  | 3.29 | 0.00  | 0.00  |
| GO_PROTEIN_TARGETING_TO_MEMBRANE                                                         | 132  | 3.23 | 0.00  | 0.00  |
| GO_MRNA_METABOLIC_PROCESS                                                                | 487  | 3.12 | 0.00  | 0.00  |
| GO_RIBOSOME_ASSEMBLY                                                                     | 46   | 3.01 | 0.00  | 0.00  |
| GO_AMIDE_BIOSYNTHETIC_PROCESS                                                            | 425  | 2.99 | 0.00  | 0.00  |
| GO_RIBONUCLEOPROTEIN_COMPLEX_SUBUNIT_ORGANIZATION                                        | 162  | 2.94 | 0.00  | 0.00  |
| GO_VIRAL_LIFE_CYCLE                                                                      | 236  | 2.90 | 0.00  | 0.00  |
| GO_RIBOSOMAL_SMALL_SUBUNIT_BIOGENESIS                                                    | 41   | 2.89 | 0.00  | 0.00  |
| GO_PEPTIDE_METABOLIC_PROCESS                                                             | 469  | 2.89 | 0.00  | 0.00  |
| GO_TRNA_METABOLIC_PROCESS                                                                | 151  | 2.86 | 0.00  | 0.00  |
| GO_RIBOSOMAL_LARGE_SUBUNIT_BIOGENESIS                                                    | 38   | 2.84 | 0.00  | 0.00  |
| GO_AMINO_ACID_ACTIVATION                                                                 | 46   | 2.82 | 0.00  | 0.00  |
| GO_CHROMOSOME_SEGREGATION                                                                | 211  | 2.76 | 0.00  | 0.00  |
| GO_CYTOPLASMIC_TRANSLATION                                                               | 34   | 2.71 | 0.00  | 0.00  |
| GO_SISTER_CHROMATID_SEGREGATION                                                          | 147  | 2.66 | 0.00  | 0.00  |
| GO_ESTABLISHMENT_OF_PROTEIN_LOCALIZATION_TO_ORGANELLE                                    | 296  | 2.65 | 0.00  | 0.00  |
| GO_MITOCHONDRIAL_TRANSLATION                                                             | 96   | 2.64 | 0.00  | 0.00  |
| GO_MATURATION_OF_SSU_RRNA                                                                | 31   | 2.63 | 0.00  | 0.00  |
| GO_RNA_SECONDARY_STRUCTURE_UNWINDING                                                     | 38   | 2.62 | 0.00  | 0.00  |
| GO_NUCLEAR_CHROMOSOME_SEGREGATION                                                        | 176  | 2.62 | 0.00  | 0.00  |
| GO_SISTER_CHROMATID_COHESION                                                             | 98   | 2.62 | 0.00  | 0.00  |
| GO_ESTABLISHMENT_OF_PROTEIN_LOCALIZATION_TO_MEMBRANE                                     | 224  | 2.59 | 0.00  | 0.00  |
| GO_RIBOSOMAL_LARGE_SUBUNIT_ASSEMBLY                                                      | 22   | 2.57 | 0.00  | 0.00  |
| GO_RIBONUCLEOPROTEIN_COMPLEX_LOCALIZATION                                                | 89   | 2.56 | 0.00  | 0.00  |
| GO_RNA_SPLICING_VIA_TRANSESTERIFICATION_REACTIONS                                        | 215  | 2.56 | 0.00  | 0.00  |
| GO_RNA_SPLICING                                                                          | 282  | 2.53 | 0.00  | 0.00  |
| GO_RNA_LOCALIZATION                                                                      | 141  | 2.52 | 0.00  | 0.00  |
| GO_TRANSLATIONAL_ELONGATION                                                              | 99   | 2.51 | 0.00  | 0.00  |
| GO_MRNA_PROCESSING                                                                       | 336  | 2.51 | 0.00  | 0.00  |
| GO_RNA_MODIFICATION                                                                      | 93   | 2.50 | 0.00  | 0.00  |
| GO_TRNA_MODIFICATION                                                                     | 49   | 2.49 | 0.00  | 0.00  |
| GO_MITOTIC_SISTER_CHROMATID_SEGREGATION                                                  | 74   | 2.48 | 0.00  | 0.00  |
| GO_TRANSLATIONAL_TERMINATION                                                             | 84   | 2.47 | 0.00  | 0.00  |
| GO_MATURATION_OF_SSU_RRNA_FROM_TRICISTRONIC_RRNA_TRANSCRIPT_SSU_RRNA_5_8S_RRNA_LSU_RRNA_ | 24   | 2.45 | 0.00  | 0.00  |
| GO_ORGANIC_CYCLIC_COMPOUND_CATABOLIC_PROCESS                                             | 349  | 2.45 | 0.00  | 0.00  |
| GO_CELLULAR_PROTEIN_COMPLEX_DISASSEMBLY                                                  | 111  | 2.45 | 0.00  | 0.00  |
| GO_TRANSCRIPTION_COUPLED_NUCLEOTIDE_EXCISION_REPAIR                                      | 63   | 2.44 | 0.00  | 0.00  |
| GO_MITOCHONDRIAL_RESPIRATORY_CHAIN_COMPLEX_I_BIOGENESIS                                  | 46   | 2.42 | 0.00  | 0.00  |
| GO_OXIDATIVE_PHOSPHORYLATION                                                             | 71   | 2.41 | 0.00  | 0.00  |
| GO_MULTI_ORGANISM_LOCALIZATION                                                           | 54   | 2.40 | 0.00  | 0.00  |

Table S3. GO-based GSEA results for expression microarray experiment on splenic cDC1s isolated after activation with poly I:C from *Myel<sup>+/+</sup>* and *Myel<sup>gfp/gfp</sup>* mice. The top 50 gene sets are reported and their ranked normalized enrichment scores.

| NAME                                                                             | SIZE | NES   | p-val | q-val |
|----------------------------------------------------------------------------------|------|-------|-------|-------|
| GO_SISTER_CHROMATID_COHESION                                                     | 101  | -2.16 | 0.00  | 0.00  |
| GO_DNA_REPLICATION_INITIATION                                                    | 21   | -2.15 | 0.00  | 0.00  |
| GO_SISTER_CHROMATID_SEGREGATION                                                  | 150  | -2.14 | 0.00  | 0.00  |
| GO_MITOTIC_RECOMBINATION                                                         | 36   | -2.12 | 0.00  | 0.00  |
| GO_NUCLEAR_CHROMOSOME_SEGREGATION                                                | 182  | -2.11 | 0.00  | 0.00  |
| GO_DNA_DEPENDENT_DNA_REPLICATION                                                 | 77   | -2.08 | 0.00  | 0.00  |
| GO_DNA_GEOMETRIC_CHANGE                                                          | 67   | -2.07 | 0.00  | 0.00  |
| GO_CHROMOSOME_SEGREGATION                                                        | 218  | -2.06 | 0.00  | 0.00  |
| GO_DNA_REPLICATION                                                               | 166  | -2.04 | 0.00  | 0.00  |
| GO_MITOTIC_SISTER_CHROMATID_SEGREGATION                                          | 74   | -2.02 | 0.00  | 0.00  |
| GO_MITOTIC_NUCLEAR_DIVISION                                                      | 306  | -2.02 | 0.00  | 0.00  |
| GO_TELOMERE_MAINTENANCE_VIA_RECOMBINATION                                        | 30   | -2.01 | 0.00  | 0.00  |
| GO_MEIOTIC_CHROMOSOME_SEGREGATION                                                | 45   | -1.97 | 0.00  | 0.00  |
| GO_DNA_TEMPLATED_TRANSCRIPTION_TERMINATION                                       | 80   | -1.97 | 0.00  | 0.00  |
| GO_TRNA_METABOLIC_PROCESS                                                        | 151  | -1.95 | 0.00  | 0.00  |
| GO_RIBONUCLEOPROTEIN_COMPLEX_BIOGENESIS                                          | 351  | -1.95 | 0.00  | 0.00  |
| GO_ORGANELLE_FISSION                                                             | 400  | -1.94 | 0.00  | 0.00  |
| GO_MEIOTIC_CELL_CYCLE_PROCESS                                                    | 113  | -1.94 | 0.00  | 0.00  |
| GO_CELL_CYCLE_G1_S_PHASE_TRANSITION                                              | 93   | -1.94 | 0.00  | 0.00  |
| GO_MITOTIC_SPINDLE_ORGANIZATION                                                  | 55   | -1.93 | 0.00  | 0.00  |
| GO_SPINDLE_CHECKPOINT                                                            | 24   | -1.93 | 0.00  | 0.00  |
| GO_DNA_SYNTHESIS_INVOLVED_IN_DNA_REPAIR                                          | 55   | -1.92 | 0.00  | 0.00  |
| GO_CHROMOSOME_ORGANIZATION_INVOLVED_IN_MEIOTIC_CELL_CYCLE                        | 35   | -1.92 | 0.00  | 0.00  |
| GO_DNA_BIOSYNTHETIC_PROCESS                                                      | 92   | -1.91 | 0.00  | 0.00  |
| GO_DNA_CONFORMATION_CHANGE                                                       | 185  | -1.91 | 0.00  | 0.00  |
| GO_RNA_MODIFICATION                                                              | 93   | -1.91 | 0.00  | 0.00  |
| GO_RECOMBINATIONAL_REPAIR                                                        | 57   | -1.91 | 0.00  | 0.00  |
| GO_DNA_DEPENDENT_DNA_REPLICATION_MAINTENANCE_OF_FIDELITY                         | 19   | -1.90 | 0.00  | 0.00  |
| GO_SPLICEOSOMAL_SNRNP_ASSEMBLY                                                   | 30   | -1.90 | 0.00  | 0.00  |
| GO_RECIPROCAL_DNA_RECOMBINATION                                                  | 31   | -1.90 | 0.00  | 0.00  |
| GO_DOUBLE_STRAND_BREAK_REPAIR                                                    | 124  | -1.89 | 0.00  | 0.00  |
| GO_TRNA_PROCESSING                                                               | 95   | -1.89 | 0.00  | 0.00  |
| GO_RRNA_MODIFICATION                                                             | 18   | -1.89 | 0.00  | 0.00  |
| GO_RIBOSOME_BIOGENESIS                                                           | 247  | -1.89 | 0.00  | 0.00  |
| GO_FORMATION_OF_TRANSLATION_PREINITIATION_COMPLEX                                | 17   | -1.89 | 0.00  | 0.00  |
| GO_STRAND_DISPLACEMENT                                                           | 22   | -1.88 | 0.00  | 0.00  |
| GO_MITOTIC_SPINDLE_ASSEMBLY                                                      | 32   | -1.88 | 0.00  | 0.00  |
| GO_CHROMOSOME_LOCALIZATION                                                       | 47   | -1.88 | 0.00  | 0.00  |
| GO_HISTONE_MRNA_METABOLIC_PROCESS                                                | 26   | -1.87 | 0.00  | 0.00  |
| GO_SPINDLE_ASSEMBLY                                                              | 58   | -1.87 | 0.00  | 0.00  |
| GO_RIBONUCLEOPROTEIN_COMPLEX_SUBUNIT_ORGANIZATION                                | 162  | -1.87 | 0.00  | 0.00  |
| GO_NCRNA_PROCESSING                                                              | 312  | -1.87 | 0.00  | 0.00  |
| GO_MATURATION_OF_5_8S_RRNA                                                       | 25   | -1.87 | 0.00  | 0.00  |
| GO_DNA_INTEGRITY_CHECKPOINT                                                      | 122  | -1.86 | 0.00  | 0.00  |
| GO_COENZYMES_BIOSYNTHETIC_PROCESS                                                | 108  | -1.86 | 0.00  | 0.00  |
| GO_REGULATION_OF_CHROMOSOME_SEGREGATION                                          | 74   | -1.86 | 0.00  | 0.00  |
| GO_TRANSCRIPTION_FROM_RNA_POLYMERASE_I_PROMOTER                                  | 33   | -1.86 | 0.00  | 0.00  |
| GO_CELL_CYCLE_PHASE_TRANSITION                                                   | 213  | -1.86 | 0.00  | 0.00  |
| GO_CELLULAR_RESPIRATION                                                          | 124  | -1.86 | 0.00  | 0.00  |
| GO_REGULATION_OF_TRANSCRIPTION_INVOLVED_IN_G1_S_TRANSITION_OF_MITOTIC_CELL_CYCLE | 22   | -1.85 | 0.00  | 0.00  |

Table S4. GO-based GSEA results for expression microarray experiment on splenic cDC1s isolated after activation with poly I:C from *Mxd1*<sup>+/+</sup> and *Mxd1*<sup>-/-</sup> mice. The top 50 gene sets are reported and their ranked normalized enrichment scores.

| NAME                  | SIZE | NES   | p-val | q-val |
|-----------------------|------|-------|-------|-------|
| E2F1_Q6               | 193  | -1.89 | 0.00  | 0.00  |
| GKGCNNTGAYG_UNKNOWN   | 49   | -1.88 | 0.00  | 0.00  |
| E2F_Q6                | 192  | -1.87 | 0.00  | 0.00  |
| E2F_Q2                | 195  | -1.86 | 0.00  | 0.00  |
| E2F_Q4                | 196  | -1.85 | 0.00  | 0.00  |
| E2F1DP1_01            | 195  | -1.83 | 0.00  | 0.00  |
| E2F_Q3                | 209  | -1.83 | 0.00  | 0.00  |
| E2F1DP2_01            | 195  | -1.83 | 0.00  | 0.00  |
| E2F_Q3                | 190  | -1.82 | 0.00  | 0.00  |
| E2F1_Q6_01            | 203  | -1.82 | 0.00  | 0.00  |
| E2F4DP1_01            | 198  | -1.82 | 0.00  | 0.00  |
| E2F1DP1RB_01          | 185  | -1.82 | 0.00  | 0.00  |
| E2F4DP2_01            | 195  | -1.81 | 0.00  | 0.00  |
| E2F1_Q3               | 200  | -1.80 | 0.00  | 0.00  |
| SGCGSSAAA_E2F1DP2_01  | 137  | -1.80 | 0.00  | 0.00  |
| E2F_Q4_01             | 204  | -1.78 | 0.00  | 0.00  |
| E2F1_Q4_01            | 198  | -1.74 | 0.00  | 0.00  |
| TMTCGGANR_UNKNOWN     | 137  | -1.74 | 0.00  | 0.00  |
| E2F_Q3_01             | 203  | -1.73 | 0.00  | 0.00  |
| E2F_Q6_01             | 204  | -1.72 | 0.00  | 0.00  |
| CGGAARNGGCG_UNKNOWN   | 45   | -1.71 | 0.00  | 0.00  |
| KTGGYRSGAA_UNKNOWN    | 58   | -1.71 | 0.00  | 0.00  |
| E2F_Q1                | 58   | -1.71 | 0.00  | 0.00  |
| E2F1_Q4               | 209  | -1.65 | 0.00  | 0.00  |
| GGAANCAGGAANY_UNKNOWN | 81   | -1.63 | 0.00  | 0.00  |
| TCCRNRTGC_UNKNOWN     | 175  | -1.61 | 0.00  | 0.01  |
| ELK1_Q2               | 209  | -1.59 | 0.00  | 0.01  |
| GABP_B                | 203  | -1.58 | 0.00  | 0.01  |
| YGCANTGCR_UNKNOWN     | 104  | -1.56 | 0.00  | 0.01  |
| KCCGNSWTTT_UNKNOWN    | 93   | -1.56 | 0.00  | 0.01  |
| ACTAYRNNCCCR_UNKNOWN  | 363  | -1.56 | 0.00  | 0.01  |
| ETS_Q4                | 219  | -1.54 | 0.00  | 0.01  |
| GGCNKCCATNK_UNKNOWN   | 104  | -1.52 | 0.00  | 0.02  |
| NRF2_Q1               | 211  | -1.52 | 0.00  | 0.02  |
| GCCATNTTG_YY1_Q6      | 354  | -1.52 | 0.00  | 0.02  |
| NFMUE1_Q6             | 202  | -1.51 | 0.00  | 0.02  |
| NRF1_Q6               | 213  | -1.51 | 0.00  | 0.02  |
| KMCATNNWGA_UNKNOWN    | 73   | -1.50 | 0.01  | 0.02  |
| MYCMAX_Q1             | 210  | -1.48 | 0.00  | 0.02  |
| MYC_Q2                | 157  | -1.47 | 0.00  | 0.03  |
| USF_Q1                | 214  | -1.47 | 0.00  | 0.03  |
| MYCMAX_Q3             | 207  | -1.47 | 0.00  | 0.03  |
| CETS1P54_Q1           | 204  | -1.46 | 0.00  | 0.03  |
| TGCGCANK_UNKNOWN      | 448  | -1.46 | 0.00  | 0.03  |
| MAX_Q1                | 216  | -1.45 | 0.00  | 0.03  |
| AACWWCAANK_UNKNOWN    | 113  | -1.45 | 0.00  | 0.04  |
| GCGNNANTTCC_UNKNOWN   | 97   | -1.44 | 0.00  | 0.04  |
| YY1_Q2                | 203  | -1.44 | 0.00  | 0.04  |
| MYOGNF1_Q1            | 39   | 1.45  | 0.05  | 0.24  |
| NFKB_Q6_Q1            | 203  | 1.57  | 0.00  | 0.23  |

Table S5. Transcription factor motif-based GSEA results for expression microarray experiment on splenic cDC1s isolated after activation with poly I:C from *Mxd1*<sup>+/+</sup> and *Mxd1*<sup>-/-</sup> mice. The top 50 gene sets and reported by their ranked normalized enrichment scores.

| NAME          | SIZE | NES   | p-val | q-val |
|---------------|------|-------|-------|-------|
| Maturation On | 248  | 3.58  | 0     | 0     |
| Cluster 30    | 66   | -2.40 | 0     | 0     |
| Cluster 31    | 67   | -2.26 | 0     | 0     |

Table S6. cDC1 maturation gene set-based GSEA results for expression microarray experiment on splenic cDC1s isolated after activation with poly I:C from *Mxd1*<sup>+/+</sup> and *Mxd1*<sup>-/-</sup> mice.
